# Supplementary material for: A green route for preparation of low surface area SiO2 microspheres from wheat straw ash with activated carbon and NPK compound fertilizer as by-products
Source: Royal Society of Chemistry journal article supplement (doi:10.1039/c5ra14622d), 2015-01-01
Supplement: c5ra14622d1.pdf [file c5ra14622d1.pdf]

## Supplementary Information

A green route for preparation of low surface area SiO<sub>2</sub> microspheres from wheat straw ash with activated carbon and NPK compound fertilizer as by-products

Jinlong Cui, Liying Cui, Fupeng Cheng, Lingjuan Liu, Hongliang Sun, Song Li, Zhongsheng Wen and Juncai Sun★

Institute of Materials and Technology, Dalian Maritime University, Dalian 116026, China

E-mail: sunjc@dlmu.edu.cn;

Tel: +86-411-84727959.

Fax: +86-411-84725960.

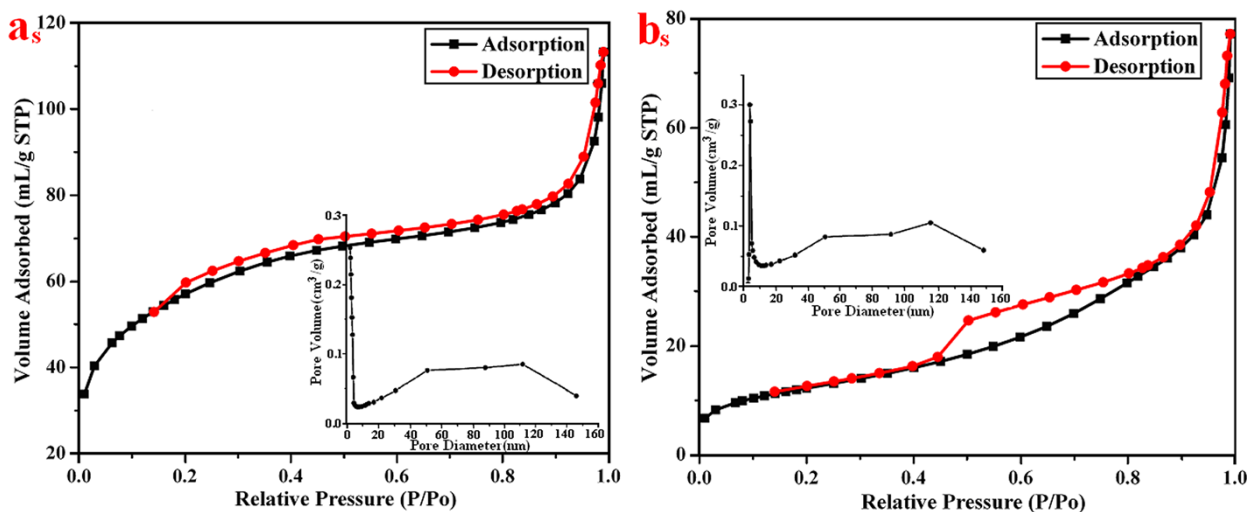

Fig. 1S N<sub>2</sub> adsorption/desorption isotherms and pore size distributions of Sf (a<sub>s</sub>) and Sh (b<sub>s</sub>)
